# Supplementary material for: Clinical Significance of Discordance between Carcinoembryonic Antigen Levels and RECIST in Metastatic Colorectal Cancer
Source: PubMed Central journal article supplement — Cancer Res Treat. 2017 May 8;50(1):283–92. doi: 10.4143/crt.2016.537 (PMC5784620; doi:10.4143/crt.2016.537), 2017-05-08
Supplement: crt-2016-537-suppl2.pdf [file crt-2016-537-suppl2.pdf]

**S2 Table.** Correlation between CEA-response and RECIST-response according to target agents (cetuximab and bevacizumab)

| 2-1. In patients with chemotherapy with cetuximab |                 |              |              |             |               |             |               |         |
|---------------------------------------------------|-----------------|--------------|--------------|-------------|---------------|-------------|---------------|---------|
|                                                   | RECIST-response |              |              |             | ORR<br>(n=27) | p-<br>value | DCR<br>(n=38) | p-value |
|                                                   | CR<br>(n=4)     | PR<br>(n=23) | SD<br>(n=11) | PD<br>(n=6) |               |             |               |         |
| <b>CEA-<br/>response</b>                          |                 |              |              |             |               | 0.046       |               | 0.178   |
| CEA-CR<br>(n=9)                                   | 1 (25.0)        | 6 (26.1)     | 2 (18.2)     | 0           | 7 (77.8)      |             | 9 (100)       |         |
| CEA-PR<br>(n=17)                                  | 1 (25.0)        | 10<br>(43.5) | 4 (36.4)     | 2 (33.3)    | 11 (64.7)     |             | 15 (88.2)     |         |
| CEA-SD<br>(n=12)                                  | 2 (50.0)        | 6 (26.1)     | 1 (9.1)      | 3 (50.0)    | 8 (66.7)      |             | 9 (75.0)      |         |
| CEA-PD<br>(n=6)                                   | 0               | 1 (4.3)      | 4 (36.4)     | 1 (16.7)    | 1 (16.7)      |             | 5 (83.3)      |         |

  

| 2-2. In patients with chemotherapy with bevacizumab |                 |              |              |             |               |             |               |         |
|-----------------------------------------------------|-----------------|--------------|--------------|-------------|---------------|-------------|---------------|---------|
|                                                     | RECIST-response |              |              |             | ORR<br>(n=36) | p-<br>value | DCR<br>(n=55) | p-value |
|                                                     | CR<br>(n=1)     | PR<br>(n=35) | SD<br>(n=16) | PD<br>(n=4) |               |             |               |         |
| <b>CEA-<br/>response</b>                            |                 |              |              |             |               | 0.065       |               | 0.144   |
| CEA-CR<br>(n=10)                                    | 0               | 8 (22.9)     | 2 (12.5)     | 0           | 8 (80.0)      |             | 10<br>(100)   |         |
| CEA-PR<br>(n=25)                                    | 0               | 19<br>(54.3) | 5 (31.3)     | 1 (25.0)    | 19<br>(76.0)  |             | 24<br>(96.0)  |         |
| CEA-SD<br>(n=13)                                    | 0               | 4 (11.4)     | 7 (43.8)     | 2 (50.0)    | 4 (30.8)      |             | 11<br>(84.6)  |         |
| CEA-PD<br>(n=8)                                     | 1 (100)         | 4 (11.4)     | 2 (12.5)     | 1 (25.0)    | 5 (62.5)      |             | 7 (87.5)      |         |

Values are presented as number (%). CEA, carcinoembryonic antigen; RECIST, response evaluation criteria in solid tumor; CR, complete response; PR, partial response; SD, stable disease; PD, progressive disease; ORR, objective response rate; DCR, disease control rate.
