# Supplementary material for: Clinical Significance of Discordance between Carcinoembryonic Antigen Levels and RECIST in Metastatic Colorectal Cancer
Source: PubMed Central journal article supplement — Cancer Res Treat. 2017 May 8;50(1):283–92. doi: 10.4143/crt.2016.537 (PMC5784620; doi:10.4143/crt.2016.537), 2017-05-08
Supplement: crt-2016-537-suppl5.pdf [file crt-2016-537-suppl5.pdf]

**S5 Table.** Multivariate analysis of OS in RECIST-PD patients

|                                                    | In RECIST-PD patients |            |         |
|----------------------------------------------------|-----------------------|------------|---------|
|                                                    | OS                    |            |         |
|                                                    | HR                    | 95% CI     | p-value |
| Age (yr)                                           |                       |            |         |
| < 65                                               | 1                     |            |         |
| ≥ 65                                               | 1.02                  | 0.57-1.81  | 0.94    |
| Sex                                                |                       |            |         |
| Female                                             | 1                     |            |         |
| Male                                               | 1.36                  | 0.67-2.73  | 0.37    |
| Location                                           |                       |            |         |
| Colon/S-colon                                      | 1                     |            |         |
| Rectum                                             | 1.14                  | 0.59-2.186 | 0.70    |
| Histological type                                  |                       |            |         |
| Well/Moderate differentiation                      | 1                     |            |         |
| Poor differentiation/Mucinous/<br>Signet ring cell | 2.54                  | 1.04-6.17  | 0.04    |
| Metastatic presentation                            |                       |            |         |
| Metachronous                                       | 1                     |            |         |
| Synchronous                                        | 1.16                  | 0.62-2.16  | 0.64    |
| Number of metastatic organs                        |                       |            |         |
| Only one (1)                                       | 1                     |            |         |
| More than one (≥ 2)                                | 2.04                  | 1.10-3.73  | 0.02    |
| First line chemotherapy                            |                       |            |         |
| FOLFOX/FOLFIRI                                     | 1                     |            |         |
| FOLFOX/FOLFIRI+target agent                        | 0.61                  | 0.25-1.48  | 0.28    |
| CEA-Response                                       |                       |            |         |
| CEA-CR                                             | 0.37                  | 0.14-0.975 | 0.04    |
| CEA-PR                                             | 1.04                  | 0.36-2.96  | 0.95    |
| CEA-SD                                             | 1.00                  | 0.49-2.049 | 0.99    |
| CEA-PD                                             | 1                     |            |         |

CEA, carcinoembryonic antigen; RECIST, Response Evaluation Criteria in Solid Tumors; PD, progressive disease; OS, overall survival; HR, hazards ratio; CI, confidence interval; FOLFOX, oxaliplatin plus fluorouracil and leucovorin; FOLFIRI, cetuximab plus irinotecan, fluorouracil, and leucovorin; CR, complete response; PR, partial response; SD, stable disease.
